# Supplementary material for: The Early Stage of the COVID-19 Outbreak in Tunisia, France, and Germany: A Systematic Mapping Review of the Different National Strategies
Source: Int J Environ Res Public Health. 2021 Aug 15;18(16):8622. doi: 10.3390/ijerph18168622 (PMC8391965; doi:10.3390/ijerph18168622)
Supplement: Supplementary file 1 [file ijerph-18-08622-s001.zip › Supplementary materials.pdf]

## Supplementary materials:

Table S1. Indicator 1.5 General Lockdown

Tab : Indicator 1.5 General Lockdown

| Country | 01/02 | 09/03 | 17/03 | 20/03 | 21/03 | 06/05 | 11/05 | 15/05 | 08/06 | 22/06 | 31/07 |
|---------|-------|-------|-------|-------|-------|-------|-------|-------|-------|-------|-------|
| Germany | 0     | 1     | 1     | 1     | 2     | 0     | 0     | 0     | 0     | 0     | 0     |
| France  | 0     | 0     | 2     | 2     | 2     | 2     | 1     | 1     | 1     | 0     | 0     |
| Tunisia | 0     | 0     | 0     | 2     | 2     | 2     | 2     | 1     | 0     | 0     | 0     |

0 - no mesure

1 - Recommend not to leave the house

2 - Require not to leave the house with exceptions for daily exercise, shopping and “essential” travel

Table S2. Indicator 1.8 Restrictions on the use of public transport

| <b>Tab : Indicator 1.8 Restrictions on the use of public transport</b> |              |              |              |              |              |              |
|------------------------------------------------------------------------|--------------|--------------|--------------|--------------|--------------|--------------|
| <b>Country</b>                                                         | <b>01/02</b> | <b>16/03</b> | <b>22/03</b> | <b>08/06</b> | <b>22/06</b> | <b>31/07</b> |
| <b>Germany</b>                                                         | 0            | 0            | 0            | 0            | 0            | 0            |
| <b>France</b>                                                          | 0            | 1            | 1            | 1            | 0            | 0            |
| <b>Tunisia</b>                                                         | 0            | 0            | 1            | 0            | 0            | 0            |

0 - No measurement

1 - Recommend closure (or considerably reduce the volume / route / means of transport available)

2 - Require closure (or prohibit most citizens from using it)

Table S3. Indicator 1.9 Closure of workplaces

| <b>Tab : Indicator 1.9 Closure of workplaces</b> |       |       |       |       |       |       |       |       |       |
|--------------------------------------------------|-------|-------|-------|-------|-------|-------|-------|-------|-------|
| <b>Country</b>                                   | 01/02 | 17/03 | 18/03 | 22/03 | 04/05 | 11/05 | 08/06 | 22/06 | 31/07 |
| <b>Germany</b>                                   | 0     | 0     | 0     | 2     | 2     | 2     | 2     | 2     | 2     |
| <b>France</b>                                    | 0     | 3     | 3     | 3     | 3     | 2     | 2     | 1     | 1     |
| <b>Tunisia</b>                                   | 0     | 0     | 1     | 3     | 2     | 2     | 0     | 0     | 0     |

0 - No measurement

1 - Recommend closure (or work from home)

2 - Require closure (or work from home) for certain sectors or categories of workers

3 - Require the closure (or working from home) of all workplaces except essential workplaces (for example: grocery stores, doctors)

Table S4. Indicator 1.11 Closure of educational establishments

| <b>Tab : Indicator 1.11 Closure of educational establishments</b> |       |       |       |       |       |       |       |       |       |       |       |       |       |
|-------------------------------------------------------------------|-------|-------|-------|-------|-------|-------|-------|-------|-------|-------|-------|-------|-------|
| <b>Country</b>                                                    | 01/02 | 26/02 | 02/03 | 09/03 | 13/03 | 16/03 | 04/05 | 11/05 | 28/05 | 18/06 | 22/06 | 07/07 | 31/07 |
| <b>Germany</b>                                                    | 0     | 2     | 2     | 2     | 2     | 3     | 2     | 2     | 2     | 3     | 3     | 1     | 1     |
| <b>France</b>                                                     | 0     | 0     | 3     | 3     | 3     | 3     | 3     | 2     | 2     | 2     | 0     | 0     | 0     |
| <b>Tunisia</b>                                                    | 0     | 0     | 0     | 2     | 3     | 3     | 3     | 3     | 2     | 2     | 2     | 2     | 2     |

0 - No measurement

1 - Recommend closure

2 - Require closure (only certain levels or categories, for example just high school, or just public schools)

3 - Require the closure of all levels

Table S5. Indicator 1.14 Restrictions on inter-territorial movements

| <b>Tab : indicator 1.14 Restrictions on inter-territorial movements</b> |              |              |              |              |              |              |              |              |              |
|-------------------------------------------------------------------------|--------------|--------------|--------------|--------------|--------------|--------------|--------------|--------------|--------------|
| <b>Country</b>                                                          | <b>01/02</b> | <b>14/03</b> | <b>17/03</b> | <b>18/03</b> | <b>19/03</b> | <b>20/03</b> | <b>04/06</b> | <b>22/06</b> | <b>31/07</b> |
| <b>Germany</b>                                                          | 0            | 0            | 0            | 1            | 2            | 2            | 2            | 2            | 2            |
| <b>France</b>                                                           | 0            | 1            | 2            | 2            | 2            | 2            | 2            | 1            | 1            |
| <b>Tunisia</b>                                                          | 0            | 0            | 0            | 0            | 0            | 2            | 0            | 0            | 0            |

0 - No measurement

1 - Recommend the restriction of movement

2 - Restrict movement

Table S6. Indicator 1.15 Restrictions on gatherings

| <b>Tab : Indicator 1.15 Restrictions on gatherings</b> |       |       |       |       |       |       |       |       |       |
|--------------------------------------------------------|-------|-------|-------|-------|-------|-------|-------|-------|-------|
| <b>Country</b>                                         | 01/02 | 29/02 | 10/03 | 20/03 | 21/03 | 11/05 | 08/06 | 07/07 | 31/07 |
| <b>Germany</b>                                         | 0     | 0     | 1     | 1     | 4     | 4     | 4     | 3     | 4     |
| <b>France</b>                                          | 0     | 4     | 4     | 4     | 4     | 3     | 3     | 3     | 3     |
| <b>Tunisia</b>                                         | 0     | 0     | 0     | 4     | 4     | 4     | 0     | 0     | 0     |

0 - No restriction

1 - Restrictions on very large gatherings (over 1000 people)

2 - Restrictions on gatherings between 100-1000 people

3 - Restrictions on gatherings of 10 to 100 people

4 - Restrictions on gatherings of less than 10 people

Table S7. Indicator 3.4 Testing strategies

| <b>Tab : Indicator 3.4 Testing strategies</b> |              |              |              |              |              |              |              |              |
|-----------------------------------------------|--------------|--------------|--------------|--------------|--------------|--------------|--------------|--------------|
| <b>Country</b>                                | <b>01/02</b> | <b>25/02</b> | <b>02/03</b> | <b>17/03</b> | <b>29/04</b> | <b>11/05</b> | <b>25/07</b> | <b>31/07</b> |
| <b>Germany</b>                                | 1            | 1            | 1            | 1            | 3            | 3            | 3            | 3            |
| <b>France</b>                                 | 0            | 2            | 2            | 1            | 1            | 2            | 3            | 3            |
| <b>Tunisia</b>                                | 0            | 0            | 1            | 1            | 1            | 1            | 1            | 1            |

0 - No testing policy

1 - Only those who both (a) have symptoms AND (b) meet specific criteria (for example, key workers admitted to hospital have been in contact with a known case, have returned from there 'foreign)

2 - Anyone with symptoms of COVID 19

3 - Open public testing (e.g. drive-thru testing available for asymptomatic people)

Table S8. Indicator 4.2 Management of international travel

| <b>Tab : Indicator 4.2 Management of international travel</b> |              |              |              |              |              |              |              |              |              |              |
|---------------------------------------------------------------|--------------|--------------|--------------|--------------|--------------|--------------|--------------|--------------|--------------|--------------|
| <b>Country</b>                                                | <b>01/02</b> | <b>28/02</b> | <b>04/03</b> | <b>09/03</b> | <b>16/03</b> | <b>17/03</b> | <b>18/03</b> | <b>16/05</b> | <b>27/06</b> | <b>31/07</b> |
| <b>Germany</b>                                                | 0            | 1            | 1            | 1            | 3            | 3            | 4            | 3            | 3            | 3            |
| <b>France</b>                                                 | 2            | 2            | 2            | 2            | 2            | 3            | 3            | 3            | 3            | 3            |
| <b>Tunisia</b>                                                | 0            | 0            | 1            | 2            | 4            | 4            | 4            | 4            | 3            | 3            |

0 - No measurement

1 - Screening

2 - Arrivals in quarantine from high-risk regions

3 - Prohibition of high-risk regions

4 - Total closure of borders

Table S9. Indicator 6.2 Contact tracing strategy

| <b>Tab : Indicator 6.2 Contact tracing strategy</b> |              |              |              |              |              |              |              |              |
|-----------------------------------------------------|--------------|--------------|--------------|--------------|--------------|--------------|--------------|--------------|
| <b>Country</b>                                      | <b>01/02</b> | <b>26/02</b> | <b>02/03</b> | <b>18/03</b> | <b>07/05</b> | <b>11/05</b> | <b>12/06</b> | <b>15/06</b> |
| <b>Germany</b>                                      | 2            | 2            | 2            | 1            | 1            | 1            | 1            | 2            |
| <b>France</b>                                       | 0            | 1            | 1            | 1            | 1            | 2            | 2            | 2            |
| <b>Tunisia</b>                                      | 0            | 0            | 1            | 1            | 2            | 2            | 2            | 2            |

0 - No contact tracking

1 - Limited contact search - not performed in all cases

2 - Complete contact search - performed for all cases
